# Supplementary material for: A low band-gap copolymer composed of thienyl substituted anthracene and diketopyrrolopyrrole compatible with multiple electron acceptors for high efficiency polymer solar cells
Source: Royal Society of Chemistry journal article supplement (doi:10.1039/c5py00358j), 2015-01-01
Supplement: c5py00358j1.pdf [file c5py00358j1.pdf]

## Supporting Information

### **Low band-gap copolymer composed of thienyl substituted anthracene and diketopyrrolopyrrole compatible with multiple electron acceptors for high efficiency polymer solar cells**

Jae Woong Jung<sup>a</sup> and Won Ho Jo<sup>\*a</sup>

<sup>a</sup>*Department of Materials Science and Engineering, Seoul National University, 1 Gwanak-ro, Gwanak-gu, San 56-1, Seoul 151-744, Korea*

#### **Characterization**

<sup>1</sup>H NMR spectra were obtained from Bruker Avance 300MHz NMR spectrometer with deuterated chloroform as a solvent. Size exclusion chromatography was performed at room temperature on Agilent 1200 GPC System (eluted with CHCl<sub>3</sub>). The molecular weights were calculated according to relative calibration with polystyrene standards. UV-Vis absorption spectra were measured with a Lambda 25 (Perkin Elmer) spectrometer. Cyclic voltammetry experiments were carried out on a potentiostat/galvanostat (VMP3, Biologic) in an electrolyte solution of 0.1 M tetrabutylammonium hexafluorophosphate in acetonitrile using gold electrodes as a counter and a working electrode, respectively, and silver/silver ion (Ag in 0.1 M AgNO<sub>3</sub> solution) was used as a reference electrode. The thin film morphology was observed by transmission electron microscopy (TEM) (JEM1010) operating at 80 kV of acceleration voltage. The crystallinities of the films were investigated by X-ray diffractometer (M18XHF-SRA). To characterize charge transport characteristics of the copolymers, thin film transistors (bottom-gate top-contact device geometry) were fabricated. On the heavily n-doped SiO<sub>2</sub>/Si substrate, the spin-coated films (thickness of 50 nm) of PTATDPP or PTAFDPP were coated from chloroform solution. Surface of the substrate was treated by octadecyltrichlorosilane to make hydrophobic dielectric surface. Au was then thermally evaporated (60 nm) as source and drain electrodes with channel width and length of 1500 μm and 30 μm, respectively. All the devices were fabricated in this study were clearly isolated to

# Polymer Chemistry

achieve negligible gate leakage current. All the field effect mobilities were extracted in the saturation regime using the relationship  $\mu_{\text{sat}} = (2 \cdot I_{\text{DS}} \cdot L) / (W \cdot C (V_{\text{G}} - V_{\text{th}})^2)$ , where  $I_{\text{DS}}$  is saturation drain current,  $C$  is capacitance of  $\text{SiO}_2$  dielectric,  $V_{\text{G}}$  is gate bias, and  $V_{\text{th}}$  is threshold voltage. The device performance was evaluated under  $\text{N}_2$  atmosphere using 4200-SCS semiconductor characterization system.

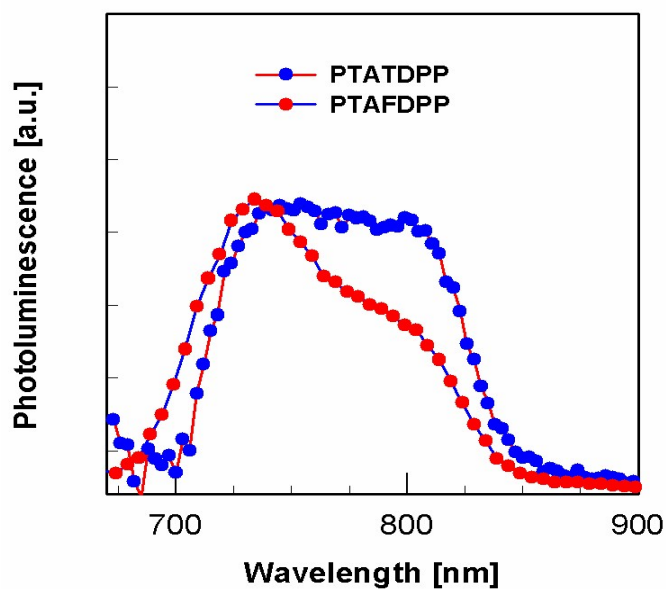

**Figure S1.** Photoluminescence spectra of PTATDPP and PTAFDPP films on glass substrates (excited at 600 nm).

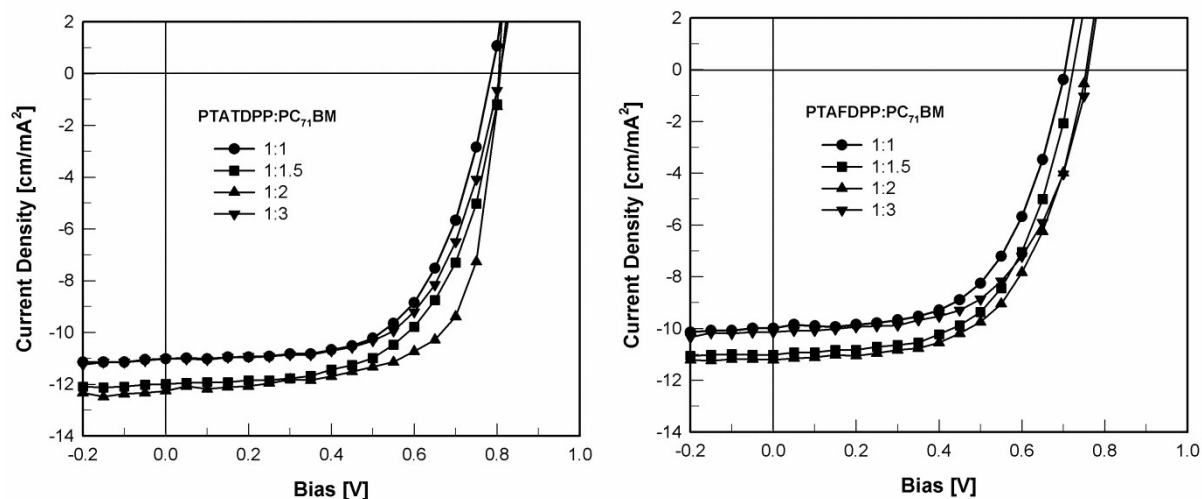

**Figure S2.** Current density–voltage curves of the PSC devices based on PTATDPP:PC<sub>71</sub>BM blend with different blend ratios (left) and PTAFDPP:PC<sub>71</sub>BM blend with different blend ratios (right) under the illumination of AM 1.5G, 100  $\text{mW}/\text{cm}^2$ .

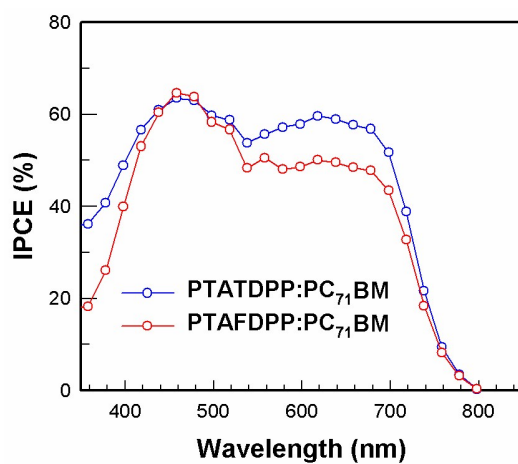

**Fig. S3.** Incident photon to current efficiencies of PSC devices made of PTATDPP:PC<sub>71</sub>BM blend and PTAFDPP:PC<sub>71</sub>BM blend films.

# Polymer Chemistry

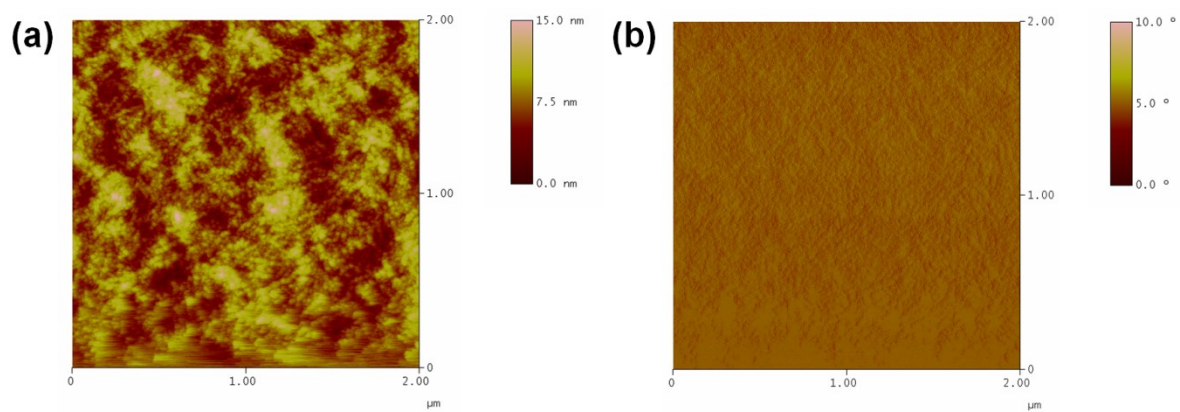

**Fig. S4.** (a) Height and (b) phase images of PTATDPP:di-PBI observed from AFM.

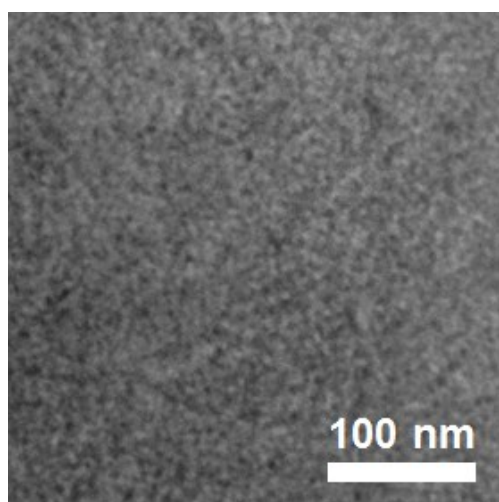

**Fig. S5.** TEM image of PTATDPP:di-PBI blend film.

# Polymer Chemistry

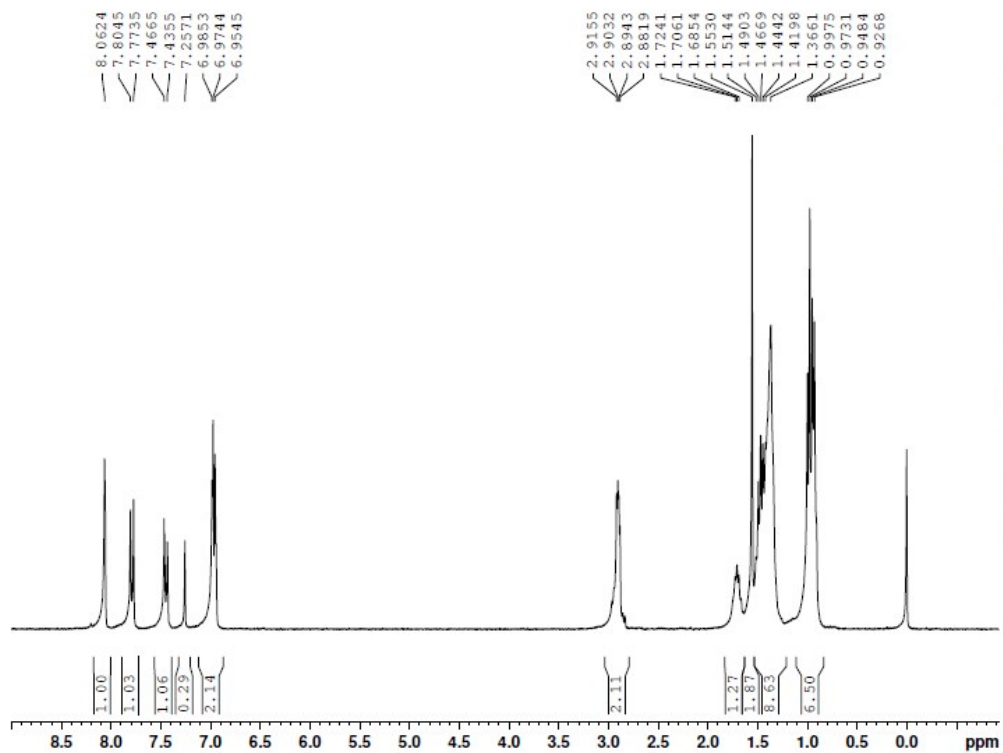

Fig. S6. <sup>1</sup>H NMR spectrum of M1.

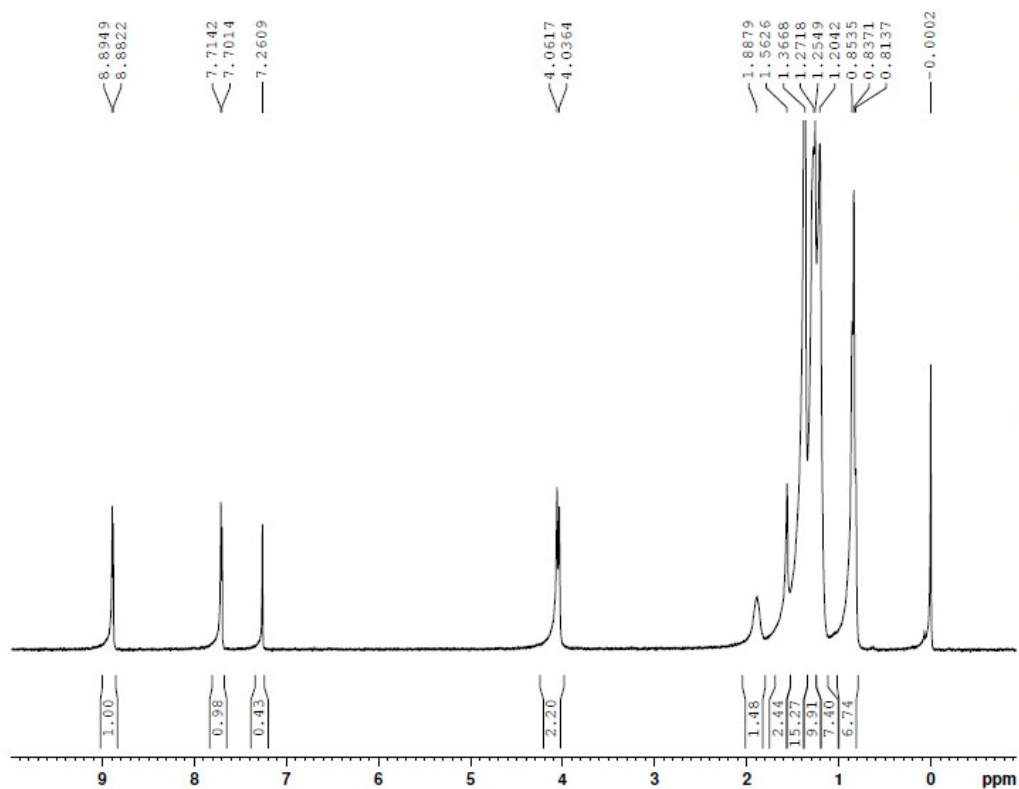

Fig. S7. <sup>1</sup>H NMR spectrum of M2.

# Polymer Chemistry

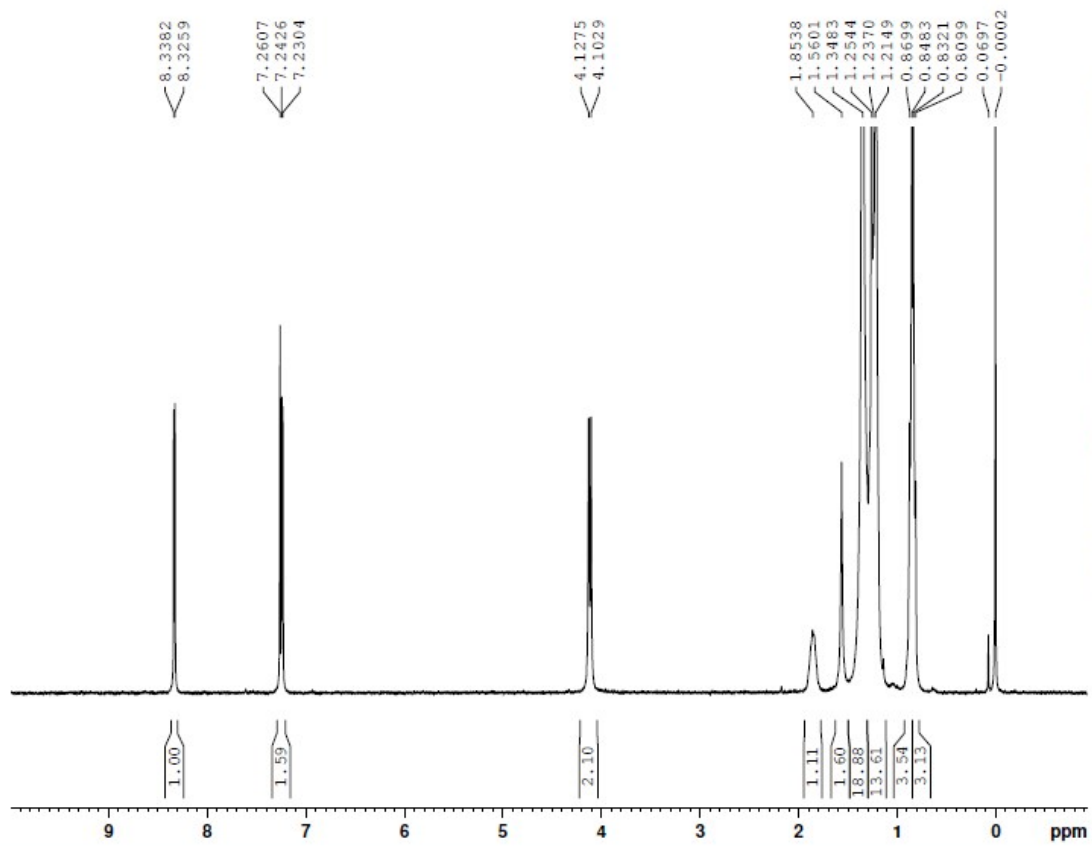

**Fig. S8.** <sup>1</sup>H NMR spectrum of M3.

# Polymer Chemistry

**Table S1.** Photovoltaic parameters of PSC devices based on PTATDPP:PC<sub>71</sub>BM blend  
PTAFDPP:PC<sub>71</sub>BM blend with different blend ratios

| Polymer | Ratio to :PC <sub>71</sub> BM | V <sub>oc</sub> (V)   | J <sub>sc</sub> (mA/cm <sup>2</sup> ) | FF                    | PCE (%) <sup>a</sup>  |
|---------|-------------------------------|-----------------------|---------------------------------------|-----------------------|-----------------------|
| PTATDPP | 1:1                           | 0.80<br>(0.80 ± 0.01) | 11.0<br>(10.6 ± 0.4)                  | 0.62<br>(0.60 ± 0.02) | 5.42<br>(5.11 ± 0.30) |
|         | 1:1.5                         | 0.81<br>(0.80 ± 0.01) | 11.1<br>(10.8 ± 0.3)                  | 0.61<br>(0.60 ± 0.01) | 5.47<br>(5.25 ± 0.21) |
|         | 1:2                           | 0.80<br>(0.80 ± 0.01) | 12.3<br>(11.4 ± 0.9)                  | 0.68<br>(0.65 ± 0.03) | 6.69<br>(6.45 ± 0.24) |
|         | 1:3                           | 0.81<br>(0.80 ± 0.01) | 11.0<br>(10.2 ± 0.7)                  | 0.63<br>(0.59 ± 0.03) | 6.00<br>(5.60 ± 0.40) |
| PTAFDPP | 1:1                           | 0.71<br>(0.71 ± 0.01) | 10.0<br>(9.4 ± 0.6)                   | 0.59<br>(0.57 ± 0.02) | 4.14<br>(3.88 ± 0.25) |
|         | 1:1.5                         | 0.73<br>(0.72 ± 0.01) | 11.0<br>(10.6 ± 0.3)                  | 0.60<br>(0.57 ± 0.02) | 4.71<br>(4.50 ± 0.21) |
|         | 1:2                           | 0.76<br>(0.75 ± 0.01) | 11.2<br>(10.1 ± 1.1)                  | 0.59<br>(0.57 ± 0.02) | 5.02<br>(4.68 ± 0.34) |
|         | 1:3                           | 0.77<br>(0.76 ± 0.01) | 10.1<br>(9.6 ± 0.4)                   | 0.59<br>(0.55 ± 0.04) | 4.59<br>(4.43 ± 0.16) |

<sup>a</sup>More than 20 devices were fabricated in each condition.

**Table S2.** Photovoltaic parameters of optimized devices based on PTATDPP and PTAFDPP.

| Polymer | Ratio to PC <sub>71</sub> BM | Device architecture | V <sub>oc</sub> (V)   | J <sub>sc</sub> (mA/cm <sup>2</sup> ) | FF                    | PCE (%) <sup>a</sup>  |
|---------|------------------------------|---------------------|-----------------------|---------------------------------------|-----------------------|-----------------------|
| PTATDPP | 1:2                          | conventional        | 0.80<br>(0.80 ± 0.01) | 12.3<br>(11.4 ± 0.9)                  | 0.68<br>(0.65 ± 0.03) | 6.69<br>(6.45 ± 0.24) |
|         |                              | inverted            | 0.80<br>(0.80 ± 0.01) | 13.1<br>(12.5 ± 0.6)                  | 0.67<br>(0.64 ± 0.03) | 7.02<br>(6.75 ± 0.27) |
| PTAFDPP | 1:2                          | conventional        | 0.76<br>(0.75 ± 0.01) | 11.2<br>(10.1 ± 1.1)                  | 0.59<br>(0.57 ± 0.02) | 5.02<br>(4.68 ± 0.34) |
|         |                              | inverted            | 0.75<br>(0.75 ± 0.01) | 11.4<br>(10.6 ± 0.5)                  | 0.61<br>(0.57 ± 0.03) | 5.22<br>(4.87 ± 0.35) |

<sup>a</sup>More than 20 devices were fabricated in each condition.

# Polymer Chemistry

## Reference

1. L. Dou, J. Gao, E. Richard, J. You, C.-C. Chen, K. C. Cha, Y. He, G. Li and Y. Yang, *J. Am. Chem. Soc.*, 2012, **134**, 10071
2. L. Dou, W.-H. Chang, J. Gao, C.-C. Chen, J. You, Y. Yang, *Adv. Mater.*, 2013, **25**, 825
